# Supplementary material for: Identifying Ortholog Selective Fragment Molecules for Bacterial Glutaredoxins by NMR and Affinity Enhancement by Modification with an Acrylamide Warhead
Source: PubMed Central journal article supplement (PMC6983068; doi:10.3390/molecules25010147), 2019-12-30
Supplement: molecules-25-00147-s001.pdf [file molecules-25-00147-s001.pdf]

# Supporting information

**Ram B. Khattri<sup>1†</sup>, Daniel L. Morris<sup>2,†,‡</sup>, Stephanie M. Bilinovich<sup>3</sup>, Erendra Manandhar<sup>4</sup>, Kahlilah R. Napper<sup>2</sup>, Jacob W. Sweet<sup>2</sup>, David A. Modarelli<sup>2</sup> and Thomas C. Leeper<sup>5,\*</sup>**

<sup>1</sup> Department of Physiology and Functional genomics, University of Florida, Gainesville, FL 32610, USA; rbk11@ufl.edu

<sup>2</sup> Department of Chemistry and Biochemistry, The University of Akron, Akron, OH 44325, USA; danmorris4127@gmail.com (D.L.M.); krn14@zips.uakron.edu (K.R.N.); jws81@zips.uakron.edu (J.W.S.); dmodarelli@uakron.edu (D.A.M.)

<sup>3</sup> Department of Pediatrics and Human Development, Michigan State University, East Lansing, MI 48824, USA; bilinovi@msu.edu

<sup>4</sup> Department of Chemistry, Berea College, Berea, KY 40404, USA; emanandhar@gmail.com

<sup>5</sup> Department of Chemistry and Biochemistry, Kennesaw State University, GA 30144, USA

\* Correspondence: tleeper@kennesaw.edu; Tel.: +1-470-578-2258; Fax.: +1-470-578-9137

† These authors contributed equally to this work.

‡ Current Address: Biochemistry and Biophysics Center, National Heart Lung and Blood Institute, National Institutes of Health, Bethesda, MD 20814, USA.

**Table S1.** Residues perturbed by 20-fold excess of fragments with all three proteins.

| <b>Fragments</b>   | <b>Residues Perturbed for BrmGRX</b>                                                                         | <b>Residues Perturbed for hGRX1</b>                                                                                                                | <b>Residues Perturbed for PaGRX</b>                                                                                                                  |
|--------------------|--------------------------------------------------------------------------------------------------------------|----------------------------------------------------------------------------------------------------------------------------------------------------|------------------------------------------------------------------------------------------------------------------------------------------------------|
| RK207 <sup>a</sup> | R51, F57, G69, S70, D71, D72, L73, A75, L76, E77                                                             | E4, F5, N7, S8, Y25, C26, R28, A29, N52, E56, I57, Y60, Q62, T65, G66, A67, R68, T69, V73, K77, G81, G82, D85, L95, L99                            | V23, T28, A29, Y33, C34, I35, Q39, C53, D54, L63, L66, S69, T70, T71, V72, Z74, I75, W76, G84, C85, D87, L88, H89, A90, L91, E92                     |
| RK144 <sup>a</sup> | A22, A38, R51, S52, F57, G69, S70, D71, D72, L73, A75, L76, E77                                              | E4, F5, S8, Q11, C26, R28, A29, N52, E56, I57, Y60, Q62, G66, A67, R68, T69, V73, K77, I80, G81, G82, D85, L95, L99                                | V23, T28, Y33, C34, I35, Q39, C53, D54, L63, L66, S69, T70, T71, V72, Z74, I75, G84, C85, D87, L88, H89, A90, L91, E92                               |
| RK246 <sup>a</sup> | R13, R51, F57, G69, S70, D71, D72, A75                                                                       | E4, F5, N7, S8, C26, R28, A29, N52, I57, Y60, G66, R68, T69, V73, K77, G81, G82, D85, L95, L99                                                     | V23, T28, A29, Y33, C34, I35, Q39, C53, D54, L63, L66, S69, T70, T71, V72, Z74, I75, G84, C85, D87, L88, H89, A90, L91, E92                          |
| RK395 <sup>a</sup> | R13, Y18, C19, E32, R51, F57, G69, S70, D71, D72, L73, A75, L76, E77                                         | E4, S8, Y25, C26, R28, A29, N52, E56, Y60, T65, G66, R68, T69, V73, K77, G81, G82, D85, L95                                                        | V23, T28, A29, C31, Y33, C34, I35, Q39, C53, D54, L63, L66, S69, T70, T71, V72, Z74, I75, W76, T80, H81, V82, G83, G84, C85, D87, L88, H89, A90, E92 |
| RK104 <sup>a</sup> | I10, T12, R13, Y18, C19, A22, L26, E32, A38, R51, S52, F57, Q59, I62, G69, S70, D71, D72, L73, A75, L76, E77 | E4, F5, S8, Q11, Y25, C26, R28, A29, V46, N52, E56, I57, Y60, Q62, T65, G66, A67, R68, T69, V73, K77, I80, G81, G82, D85, S92, E94, L95, L99       | V23, T28, A29, C31, Y33, C34, I35, Q39, C53, D54, L63, L66, S69, T70, T71, V72, Z74, I75, W76, T80, H81, G84, C85, D87, L88, H89, A90, L91, E92      |
| RK208 <sup>a</sup> | I10, T12, R13, Y18, C19, A22, L26, E32, A38, R51, S52, F57, Q59, I62, G69, S70, D71, D72, L73, A75, L76, E77 | E4, F5, S8, Q11, Y25, C26, R28, A29, V46, N52, E56, I57, Y60, Q62, T65, G66, A67, R68, T69, V73, K77, I80, G81, G82, D85, S92, E94, L95, L99, I102 | V23, T28, A29, C31, Y33, C34, I35, Q39, C53, D54, L63, L66, S69, T70, T71, V72, Z74, I75, W76, T80, H81, G84, C85, D87, L88, H89, A90, L91, E92      |
| RK192 <sup>a</sup> | R13, L26, A38, R51, F57, G69, S70, D71, D72, L73, A75, L76, E77                                              | E4, F5, S8, Y25, C26, R28, A29, N52, E56, I57, Q62, T65, G66, A67, R68, T69, V73, K77, G81, G82, D85, L95, L99                                     | V23, T28, C31, Y33, C53, D54, L63, L66, T71, V72, Z74, I75, G84, C85, D87, L88, H89, L91, E92                                                        |

<sup>a</sup> Blue letters indicates residues showing large CSPs or broadening effects.

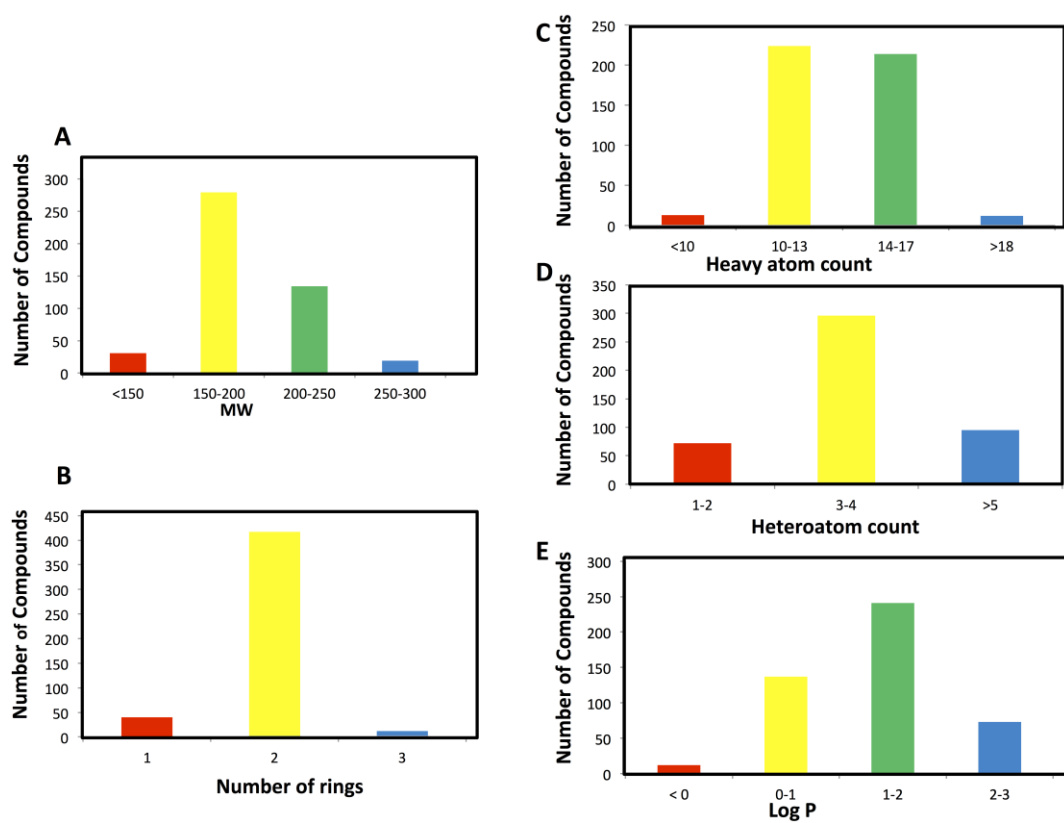

**Figure S1.** Diversity of different parameters in the library. Diversity of: (A) molecular weight, B) number of rings C) heavy atom count D) heteroatom count and E) partition coefficient ( $\log P$ ) values.

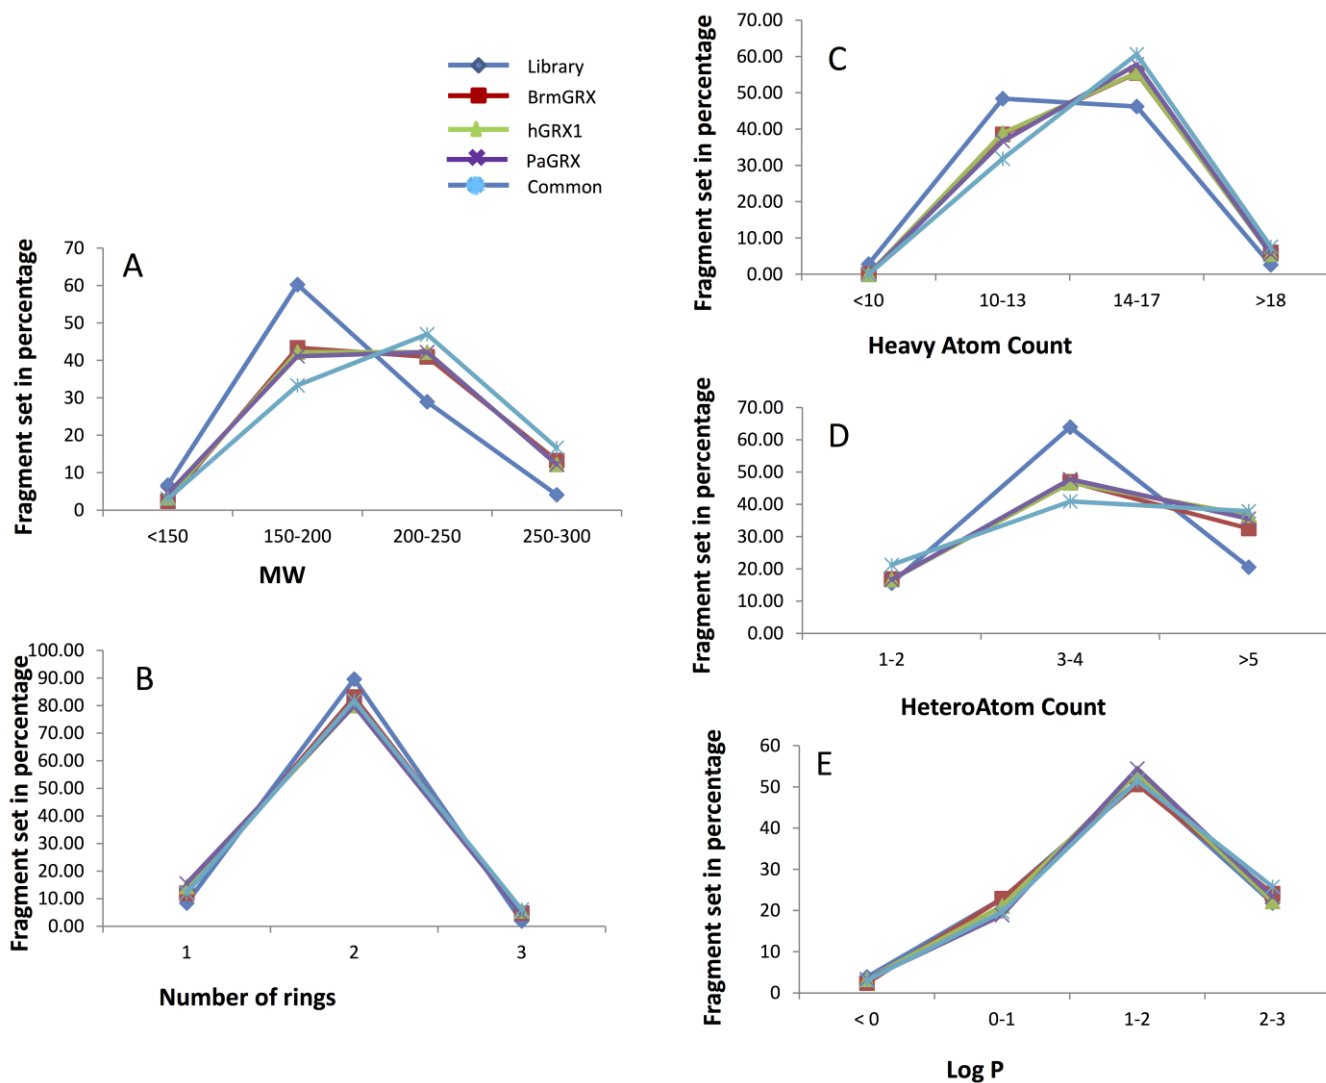

**Figure S2.** Diversity of average physicochemical parameters in-between hits and library: (A) molecular weight, (B) number of rings (C) heavy atom count (D) heteroatom count (E) logP; for hits of three orthologous proteins, common hits and library.

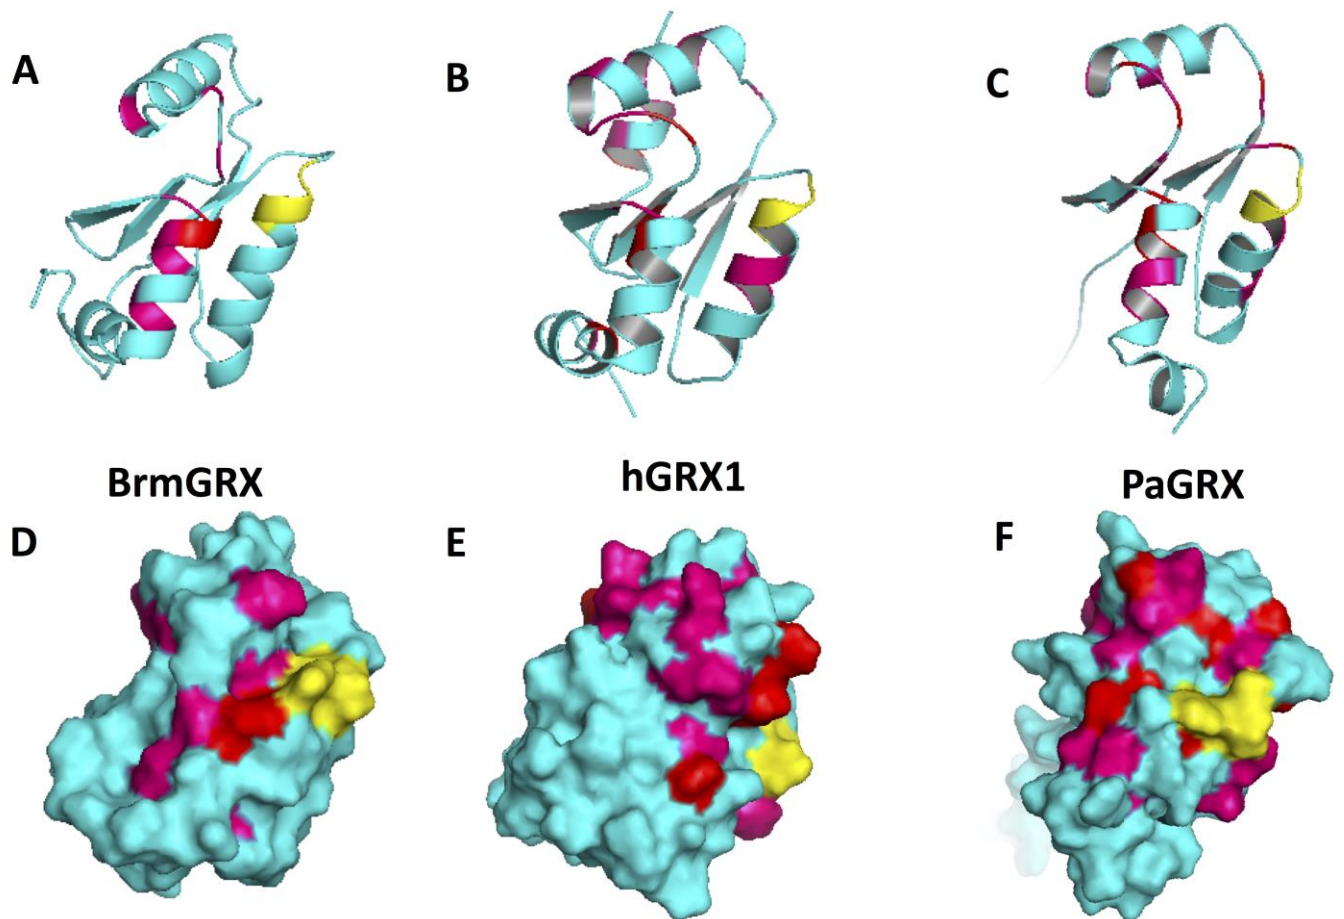

**Figure S3.** 2D NMR CSPs mapping. (A), (B), and (C) represents secondary structures; and (D), (E), and (F) are the surface structures with CSPs mapping for BrmGRX, hGRX1, and PaGRX, respectively. Yellow patch: conserved active site; red patches: residues with CSPs  $\geq 0.1$  ppm; and pink patches: residues with CSPs  $\leq 0.1$  ppm with large excess of fragment.

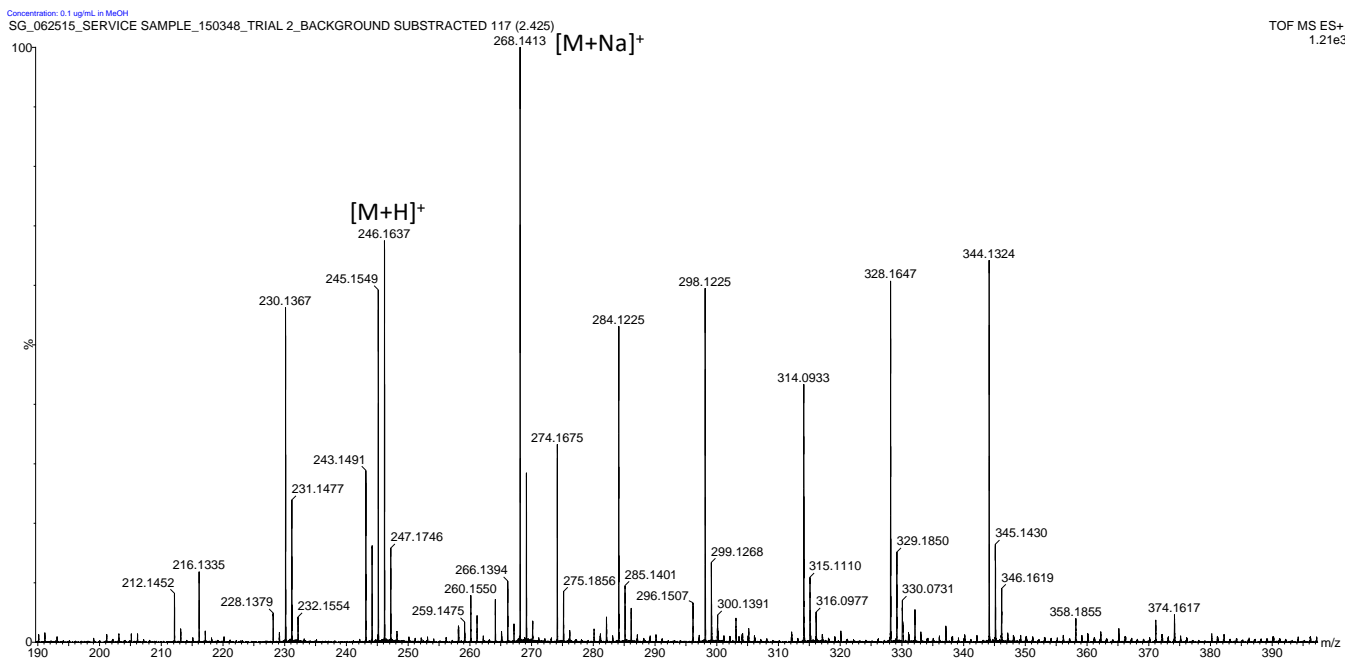

**Figure S4.** HRMS for RK395ACP in methanol. HRMS calculated for  $C_{14}H_{19}N_3O$  246.1606, found 246.1637 ( $M + H^+$ ).

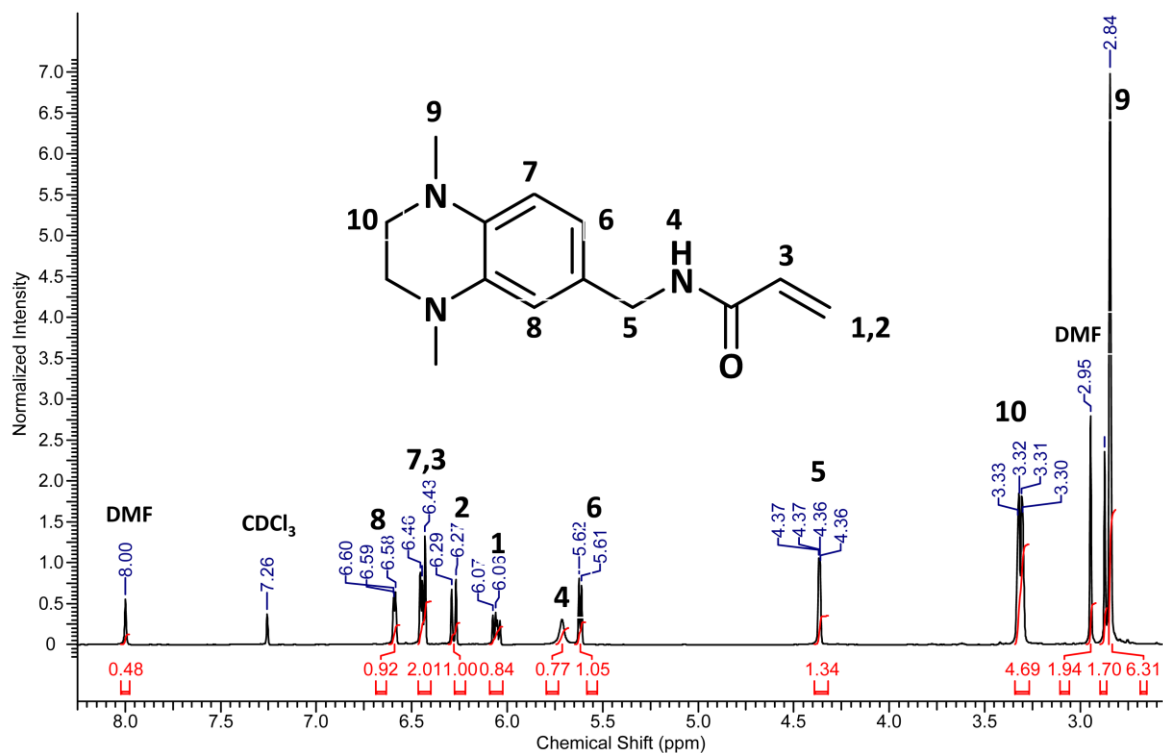

**Figure 5.** 1D  $^1H$  NMR for RK395ACP.

$^1H$  NMR (750 MHz,  $CDCl_3$ )  $\delta$  6.59-6.60 (d, 1H), 6.45-6.46 (d, 1H), 6.43 (s, 1H), 6.27-6.29 (d, 1H), 6.03-6.07 (m, 1H), 5.65 (s, 1H), 5.61-5.63 (d, 1H), 4.37 (s, 2H), 3.31-3.32 (d, 4H), 2.84 (s, 6H)

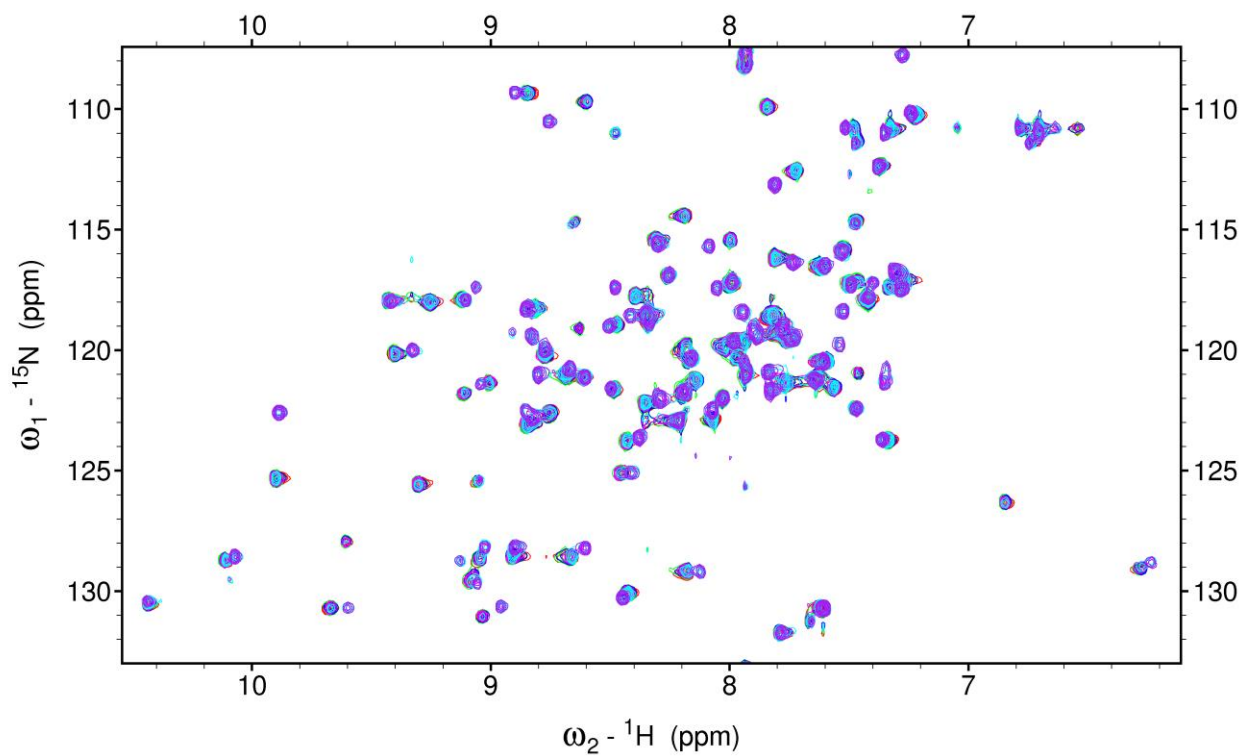

**Figure S6.** Spectral overlays for PaGRX reacted with RK395 ACP—Green: 0 h, blue 1 h, magenta: 2 hours, cyan: 6 h, purple: 24 h.
